# Supplementary material for: Comprehensive Proteomic Analysis of Spider Dragline Silk from Black Widows: A Recipe to Build Synthetic Silk Fibers
Source: MDPI journal article supplement (doi:10.3390/ijms17091537), 2016-09-13
Supplement: s1 [file s1]

# Supplementary Materials: Comprehensive Proteomic Analysis of Spider Dragline Silk from Black Widows: A Recipe to Build Synthetic Silk Fibers

Camille Larracas, Ryan Hekman, Simmone Dyrness, Alisa Arata, Caroline Williams, Taylor Crawford and Craig A. Viera

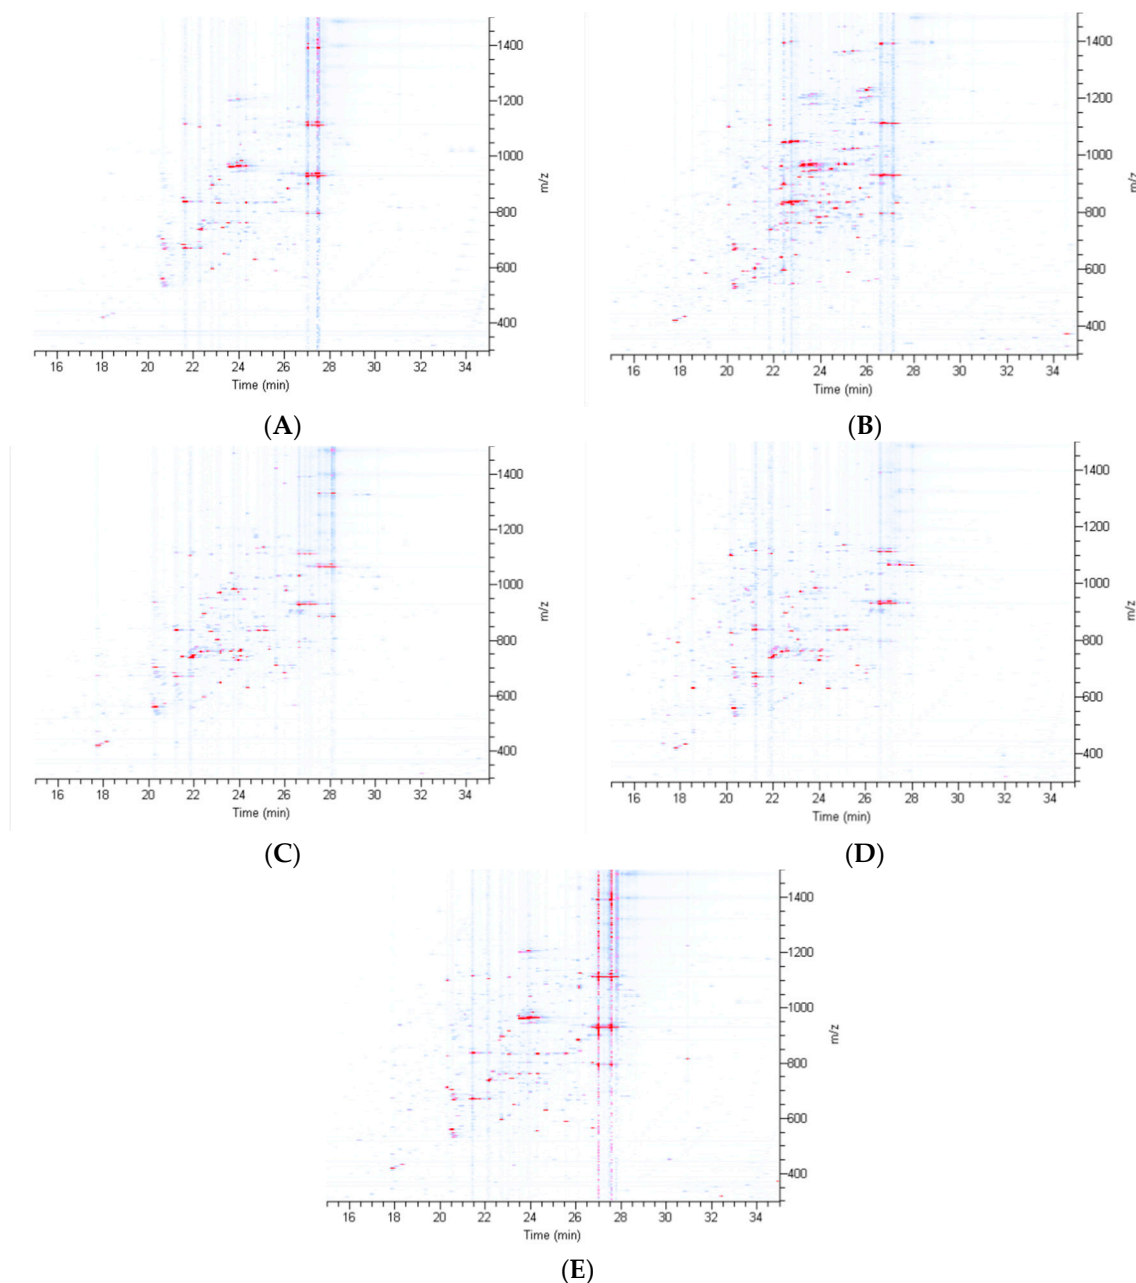

**Figure S1.** Density map of in-solution tryptic digestion products obtained from dragline silk treated with different chemical solvents. The X-axis reveals the retention time (min) for the precursor ions eluted during nano-LC MS analysis, while the Y-axis shows the  $m/z$  values ( $z = +2$  to  $+8$ ); (A) GdnHCl; (B) GITC; (C) urea; (D) LiBr; (E) HFIP.

| Accession # | GdnHCl  | LiBr    | Urea    | GITC    | HFIP    |                               |
|-------------|---------|---------|---------|---------|---------|-------------------------------|
| A6YIY1      | Present | Present | Present | Present | Present | MaSp1                         |
| A6YIY0      | Present | Present | Present | Present | Present | MaSp2                         |
| K7YP04      | Present | Present | Absent  | Present | Present | AcSp1                         |
| A9QE53      | Present | Absent  | Absent  | Present | Present | AcSp1-like                    |
| C7T5D2      | Present | Absent  | Absent  | Absent  | Present | PySp1                         |
| Custom      | Present | Absent  | Absent  | Present | Present | CRP1                          |
| E7D1S5      | Present | Present | Present | Present | Present | CRP2                          |
| E7D1H3      | Present | Absent  | Absent  | Absent  | Present | CRP4                          |
| E7D181      | Present | Absent  | Absent  | Present | Present | CRISP3                        |
| E7D1Z1      | Present | Absent  | Absent  | Absent  | Present | Fasciclin                     |
| E7D1I1      | Present | Absent  | Absent  | Absent  | Absent  | Alpha B-crystallin            |
| O01717      | Absent  | Present | Absent  | Absent  | Absent  | Alpha-2 macroglobulin         |
| J7G653      | Absent  | Absent  | Present | Absent  | Absent  | Aggregate gland silk factor 1 |
| J7FXP9      | Absent  | Present | Absent  | Absent  | Absent  | Aggregate gland silk factor 2 |
| B7SVM7      | Absent  | Present | Absent  | Absent  | Absent  | Aggregate spider glue 2       |
| E7D1Q9      | Absent  | Absent  | Absent  | Absent  | Present | Cystatin                      |
| Q52P73      | Absent  | Present | Absent  | Absent  | Absent  | Egg case silk protein-1       |
| E7D174      | Absent  | Present | Absent  | Absent  | Absent  | Gamma-glutamyltransferase 1   |
| E7D1W6      | Absent  | Absent  | Present | Absent  | Absent  | p-23-like protein             |
| E7D1B0      | Absent  | Absent  | Absent  | Absent  | Present | Ribosomal protein L4          |
| E7D1H9      | Present | Present | Present | Present | Present | Uncharacterized protein       |
| E7D1N6      | Absent  | Present | Absent  | Absent  | Absent  | Uncharacterized protein       |
| E7D1N5      | Absent  | Present | Absent  | Absent  | Absent  | Uncharacterized protein       |
| E7D1V8      | Absent  | Present | Absent  | Absent  | Absent  | Uncharacterized protein       |
| E7D1V7      | Absent  | Present | Absent  | Absent  | Absent  | Uncharacterized protein       |
| E7D1V0      | Absent  | Present | Absent  | Absent  | Absent  | Uncharacterized protein       |
| E7D1M7      | Absent  | Present | Absent  | Absent  | Absent  | Uncharacterized protein       |
| J7FZ48      | Absent  | Absent  | Absent  | Absent  | Present | Uncharacterized protein       |

Present   
 Absent 

**Figure S2.** Chart of presence (dark) or absence (light) of proteins that are predicted within dragline silk using all 5 solvents. Accession numbers are shown on the left and names of the proteins on the right.

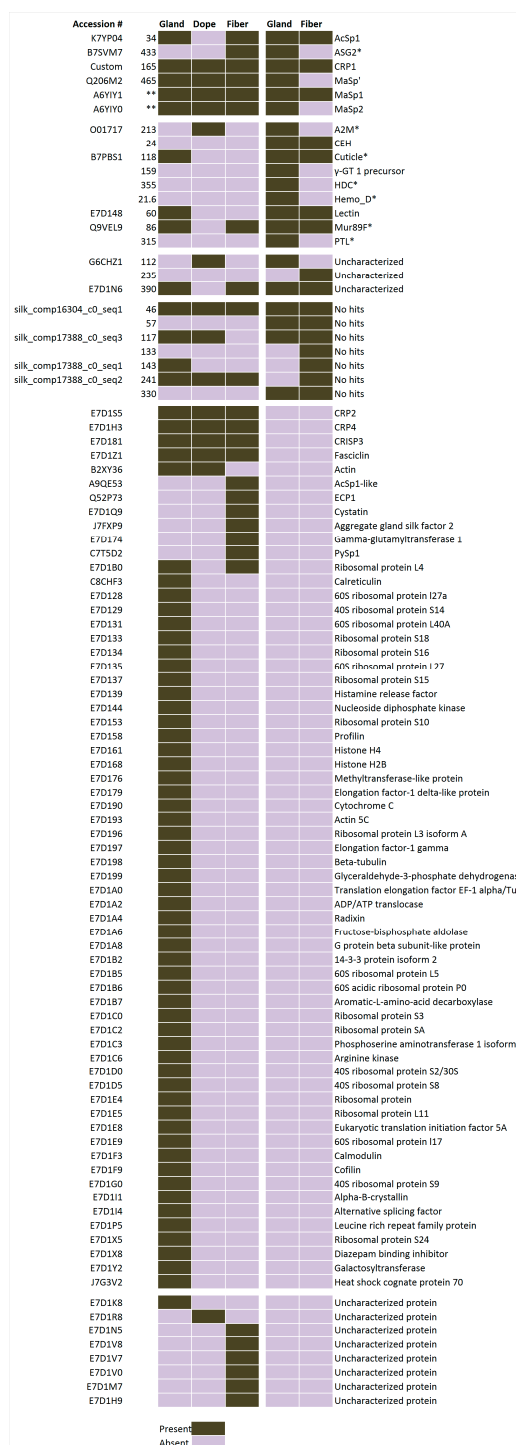

**Figure S3.** Chart of presence (black) or absence (light purple) of proteins that are predicted within the MA gland, dope and fiber. Two proteomic data sets are available from *L. hesperus* for comparative purposes. The left panel (gland, dope, and fiber) were conducted with an Orbitrap Fusion™ Tribrid™ mass spectrometer with 5 different solvent treatments and 3 modes of peptide ion dissociation (CID, HCD, and ETD), while the right panel (gland, fiber) was conducted using a LTQ Orbitrap Velos™ mass spectrometer and one mode of ion dissociation (CID) [9]. Accession numbers, scaffolding IDs, and SSTs are listed on the left [9]. Custom indicates the sequence was added into the database manually. No hits indicates the sequences do not match anything in the databases. \* Indicate some peptide sequences that were derived from SSTs that are uncharacterized in *L. hesperus*, but are thought to be homologous to known proteins in different species. \*\* Indicate protein types with more than one predicted protein [9].
